# Supplementary material for: Multiple blood feeding in mosquitoes shortens the Plasmodium falciparum incubation period and increases malaria transmission potential
Source: PLOS journal article supplement (doi:10.1371/journal.ppat.1009131), 2020-12-31
Supplement: S1 (10.1371/journal.ppat.1009131.s001) [file journal.ppat.1009131.s001]

## S1 Text

### Modeling Details

Our simplified formula for  $R_0$ ,

$$R_0(T) = \sqrt{f(T)e^{-g(T)}},$$

can be related to the original equation from Mordecai *et al.* [30] reproduced here as,

$$R_0(T) = \sqrt{\frac{a(T)^2 bc(T) e^{-\frac{\mu(T)}{PDR(T)}} EFD(T) p_{EA}(T) MDR(T)}{Nr\mu^3(T)}},$$

by

$$f(T) = \frac{a(T)^2 bc(T) EFD(T) p_{EA}(T) MDR(T)}{Nr\mu^3(T)}$$

and

$$g(T) = \frac{\mu(T)}{PDR(T)}.$$

The expression is based on temperature-dependent trait data from *Anopheles* species that vary with temperature including biting rate ( $a$ ), vector competence ( $bc$ ), adult mosquito mortality ( $\mu$ ), parasite development rate ( $PDR$ ), egg-to-adult survival probability ( $p_{EA}$ ), mosquito development rate ( $MDR$ ) and eggs laid per female per day ( $EFD$ ). Note that adult mortality is calculated through daily adult survival ( $p$ ) via  $p = e^{-\mu}$ ; parasite development rate is one over the extrinsic incubation period ( $EIP$ ); and mosquito development rate is one over the larval development time ( $\tau_{EA}$ ). Human related quantities—human density ( $N$ ) and recovery rate ( $r$ )—are not temperature-dependent. Furthermore, explicit values are not necessary as  $N$  and  $r$  cancel out in our final ratios. The temperature-dependent traits of biting rate, parasite development rate and mosquito development time were fit to Brière functions, represented by

$$cT(T - T_0)(T_m - T)^{\frac{1}{2}},$$

where  $c$ ,  $T_0$  and  $T_m$  are constants defined in previously published work (**S5 Table**) [30]. The temperature-dependent traits vector competence, daily adult survival, egg-to-adult survival probability and eggs laid per female were fit to quadratic functions, represented by

$$qT^2 + rT + s,$$

where  $q$ ,  $r$ , and  $s$  are constants determined in previously published work (**S6 Table**) [30]. The original calculation of this function was done using EFD data from *Aedes albopictus*, as there were no data available describing the relationship between *Anopheles* EFD and temperature. We updated this function using recently published data from Villena *et al.* [61], which we fit to a quadratic function using the nls function in R as in [30] (**S3 Fig**).

Our modified basic reproductive number incorporating a second blood feeding by scaling EIP using the term  $\beta$ , which we refer to as  $R_0^b$  given by

$$R_0^b(T) = \sqrt{\frac{a(T)^2 bc(T) e^{-\beta \frac{\mu(T)}{PDR(T)}} EFD(T) p_{EA}(T) MDR(T)}{Nr\mu^3(T)}}.$$

We determine the scaling parameter  $\beta$  as the relative reduction in EIP in the presence of a second blood feed, given by

$$\beta = \frac{2 \text{ blood feeds}}{1 \text{ blood feed}} = \frac{8.63}{10.88} = 0.73.$$

The change in  $R_0$  (**S4 Fig**) using a shortened EIP is shown by the ratio of the modified  $R_0$  to the original  $R_0$  as

$$\frac{R_0^b}{R_0}.$$
